# Supplementary material
Source: HighWire-hosted journal article supplement (https://tsaco.smart01.highwire.org/content/8/1/e001103)
Supplement: inline-supplementary-material-1 [file inline-supplementary-material-1.pdf]

**Supplementary Material-Appendix A****Questionnaire 1:****Hospital related questions**

الأسئلة المتعلقة بالمستشفى

1. Please provide the name of the institution you work in:

يرجى تحديد اسم المؤسسة التي تعمل بها

2. Select your position in the hospital: (Administrative, Medical Doctor or a Registered Nurse)

(طبيب/ة, ممرض/ة مسجل/ة, حدد وظيفتك في المستشفى: (إداري/ة)

**PLEASE PROVIDE AN ANSWER OR N/A IF ANSWER NOT AVAILABLE**

يرجى تقديم إجابة أو لا ينطبق إذا لم يكن الجواب متاحاً

**Questions related to overall data of the explosion:**

أسئلة تتعلق بالبيانات الإجمالية ليلية الانفجار

| number of patients divided (In-patients and out-patients)<br>(عدد المرضى مقسم إلى (الداخليون و الخارجيون)                                                                                           | Within first 24 hours of the explosion<br>خلال الـ 24 ساعة الأولى من الانفجار | After 24 hours of the explosion<br>بعد 24 ساعة من الانفجار |
|-----------------------------------------------------------------------------------------------------------------------------------------------------------------------------------------------------|-------------------------------------------------------------------------------|------------------------------------------------------------|
| 1. How many patients were treated in the emergency department for minor injuries, and discharged afterwards?<br>كم عدد المرضى الذين عولجوا في قسم الطوارئ لإصابات طفيفة وخرجوا من المستشفى بعد ذلك؟ |                                                                               |                                                            |
| 2. How many patients were admitted to regular floor?<br>كم عدد المرضى الذين نقلوا إلى الطوابق؟                                                                                                      |                                                                               |                                                            |
| 3. How many patients were admitted to the Intensive Care Unit?<br>كم عدد المرضى الذين تم قبولهم في وحدة العناية المركزة؟                                                                            |                                                                               |                                                            |
| <b>Total Number of Admissions to the hospital (regular floor + ICU)</b><br>(إجمالي عدد حالات الدخول إلى المستشفى (طابق عادي + وحدة العناية المركزة)                                                 | 0                                                                             |                                                            |
| <b>How many injured patients did you receive in total ?</b><br>كم عدد المصابين الذين استقبلهم المستشفى إجمالاً ليلة الانفجار؟                                                                       | 0                                                                             |                                                            |

| 4. Major Surgeries*<br>العمليات الجراحية الكبرى | Within first 24 hours<br>خلال الـ 24 ساعة الأولى | After 24 hours of admission<br>بعد 24 ساعة من الدخول |
|-------------------------------------------------|--------------------------------------------------|------------------------------------------------------|
|                                                 |                                                  |                                                      |

|                                                                               |   |
|-------------------------------------------------------------------------------|---|
| <b>Total Number of Major Surgeries</b><br>إجمالي عدد العمليات الجراحية الكبرى | 0 |
|-------------------------------------------------------------------------------|---|

| 5. Type of Surgery**<br>نوع العملية الجراحية                     | Neuro/جراحة الاعصاب | Thorax/الصدر | Abdominal/في البطن | Extremity/جراحة الأطراف |
|------------------------------------------------------------------|---------------------|--------------|--------------------|-------------------------|
| <b>Total Number of Surgeries</b><br>إجمالي عدد العمليات الجراحية | 0                   |              |                    |                         |

|                                                                                                                                                                                                               |  |
|---------------------------------------------------------------------------------------------------------------------------------------------------------------------------------------------------------------|--|
| 6. Was COVID-19 PCR done on the admitted patients to regular floor and ICU? Yes or No question<br>للمرضى الذين تم إدخالهم إلى الطابق العادي ووحدة العناية COVID-19 PCR هل تم إجراء المركز؟ الإجابة بنعم أو لا |  |
| 7. Were results verified? Yes or No question<br>هل تم التحقق من النتائج؟ الإجابة بنعم أو لا                                                                                                                   |  |
| 8. If PCR was done, what is the number of COVID-19 Positive admitted patients?<br>، فما هو عدد المرضى الذين اتت نتائجهم إيجابية وتم إدخالهم إلى المستشفى PCR إذا تم إجراء                                     |  |

|                                                                                           |  |
|-------------------------------------------------------------------------------------------|--|
| 9. How many patients had a Major Amputation?***<br>عدد المرضى الذين خضعوا لعملية بتر كبرى |  |
|-------------------------------------------------------------------------------------------|--|

|                                                                                                                                                                                                                                                                                                                                                                                                                                       |  |
|---------------------------------------------------------------------------------------------------------------------------------------------------------------------------------------------------------------------------------------------------------------------------------------------------------------------------------------------------------------------------------------------------------------------------------------|--|
| <p>10. How many patients were Severely Disabled?****<br/>عدد المرضى الذين أصيبوا بإعاقة جسدية شديدة بسبب الانفجار</p>                                                                                                                                                                                                                                                                                                                 |  |
| <p>11. Do you have a mass casualty plan? Yes or No question<br/>هل لديك خطة لحوادث الإصابات الجماعية؟ الإجابة بنعم أو لا</p> <p>12. If Yes, was it implemented?<br/>إذا كانت الإجابة بنعم ، فهل تم تنفيذها؟</p> <p>13. Due to the rapid influx and high number of patients, how long did it take you to start triage? (in hours)<br/>بعدد) نظرًا لسرعة تدفق المرضى وعددهم الكبير، ما المدة التي استغرقتها البدء بالفرز؟ (الساعات)</p> |  |
| <p>14. Who did the triage? A nurse? A medical doctor? or both ?<br/>من قام بالفرز؟؟ ممرض/ة؟ طبيب/ة؟ أو كلاهما ؟</p>                                                                                                                                                                                                                                                                                                                   |  |
| <p>15. Were there psychiatric evaluation for the admitted patients? Yes or No question<br/>هل تم القيام بتقييم نفسي للمرضى المقبولين؟ الإجابة بنعم أو لا</p> <p>16. Were there psychiatric follow up for the discharged patients? Yes or No question<br/>هل كانت هناك متابعة نفسية للمرضى الذين خرجوا من المستشفى؟ الإجابة بنعم أو لا</p>                                                                                             |  |
| <p>17. How many patients were dead upon arrival to the Emergency Department?<br/>عدد المرضى الذين توفوا عند وصولهم لقسم الطوارئ</p>                                                                                                                                                                                                                                                                                                   |  |

18. How many patients died in the Emergency Department?

عدد المرضى الذين ماتوا في قسم الطوارئ

19. How many patients died within 24 hours of admission?

عدد المرضى الذين ماتوا خلال 24 ساعة من الدخول

20. How many patients died after 24 hours of admission?

عدد المرضى الذين ماتوا بعد 24 ساعة من الدخول

**Total Number of Deaths/العدد الإجمالي للوفيات**

**0**

\*Major Surgeries: an operation upon an organ within the cranium, chest, abdomen, or pelvic cavity, / عمليات الكبرى: عملية /

داخل الجمجمة أو الصدر أو البطن أو تجويف الحوض

\*\*Type of surgeries: Neuro (involving brain, spinal cord, Ophtalmo and ENT), Thorax, Abdomen (including Pelvis) and Extremity (involving all the 4 limbs).

نوع العمليات الجراحية: عصبية (تشمل الدماغ والحبل الشوكي وجراحة العيون والأنف والحنجرة) , الصدر , البطن (بما في ذلك الحوض) والأطراف (تشمل الأطراف الأربعة)

\*\*\*Major Amputation: to cut (a part, such as a limb) from the body, Hand and above, Foot and above./ عملية البتر الكبرى:

عملية قطع (جزء ، مثل الطرف) من الجسم ، من اليد وما فوق ، القدم وما فوق

\*\*\*\*Severely Disabled: impaired or limited by a physical, mental, cognitive, or developmental condition. / لإعاقة الشديدة:

أضعف أو قُيِّد بسبب حالة بدنية أو عقلية أو إدراكية أو تنموية

**Questionnaire 2:**

| <b>Phase II. Individualized Questionnaire for Out-Patients</b>                                                                                                                                                                                                                                                                                                                                                                                                                                                                                                                                                           |                |
|--------------------------------------------------------------------------------------------------------------------------------------------------------------------------------------------------------------------------------------------------------------------------------------------------------------------------------------------------------------------------------------------------------------------------------------------------------------------------------------------------------------------------------------------------------------------------------------------------------------------------|----------------|
| <b>Insitution:</b>                                                                                                                                                                                                                                                                                                                                                                                                                                                                                                                                                                                                       |                |
| <b>Patient's ID:</b>                                                                                                                                                                                                                                                                                                                                                                                                                                                                                                                                                                                                     |                |
| <b>Questions related to Public Health</b>                                                                                                                                                                                                                                                                                                                                                                                                                                                                                                                                                                                | <b>Answers</b> |
| <ol style="list-style-type: none"> <li>1. <i>Any patients who specifically developed cough, wheeze and excessive phlegm production</i></li> <li>2. <i>Other respiratory symptoms caused by exposure to dust / higher levels of air pollution</i></li> <li>3. <i>Eye problems (irritation, erythema, secretions...)</i></li> <li>4. <i>Skin irritations / reaction (including delayed reaction, rash, )</i></li> <li>5. <i>Any cardiac events (e.g. chest pain, palpitation, dyspnea... )</i></li> <li>6. <i>Any atypical neurological effects (somatisation, headaches, tinnitis, imbalance, tinnitis...)</i></li> </ol> |                |
| <b>Questions related to Mental Health</b>                                                                                                                                                                                                                                                                                                                                                                                                                                                                                                                                                                                | <b>Answers</b> |
| <ol style="list-style-type: none"> <li>1. <i>Any record of significant mental health / psychological distress (anxiety, depression, insomina, paranoia...)</i></li> </ol>                                                                                                                                                                                                                                                                                                                                                                                                                                                |                |

**Questionnaire 3:**

| <b>Phase II. Individualized Questionnaire for In-patients</b>   |                |
|-----------------------------------------------------------------|----------------|
| <b>Insitution:</b>                                              |                |
| <b>Patient's ID:</b>                                            |                |
| <b>Questions related to Public Health</b>                       | <b>Answers</b> |
| 1. Admission to Regular Floor or ICU                            |                |
| 2. Were the patient operated?                                   |                |
| 3. Injury category (Primary, Secondary, Tertiary, Quaternary)*: |                |
| 4. COVID status (positive or negative):                         |                |
| 5. Toxic inhilation symptoms:                                   |                |
| 6. Length of stay in the hospital:                              |                |
| 7. Diagnosis:                                                   |                |
| 8. ICD 10 Code:                                                 |                |
| 9. Death in Hospital:                                           |                |
| 10. Disability after discharge: IF yes, What is it?             |                |
| In case they want a <b>free</b> evaluation/re-evaluation        |                |

\*1.Primary: Tympanic membrane rupture, Blast Lung, Eye Injury, Concussion

2. Secondary: Penetrating Injury, Traumatic amputations, Lacerations, Concussion, iatrogenic

3. Tertiary: Blunt Injuries, Crush Syndrome, Compartment Syndrome, Concussion

4. Quaternary: Burns, Toxic gas or other inhalation injury, Injury-env. contamination
