# Supplementary material
Source: HighWire-hosted journal article supplement (https://tsaco.smart01.highwire.org/content/8/1/e001103)
Supplement: inline-supplementary-material-2 [file inline-supplementary-material-2.pdf]

**Supplementary Material- Appendix B****Table B1** Distribution of injury characteristics of the in-patient sample in phase 2 (N=282).

| <b>Variable</b>               | <b>N (%)</b> | <b>Mean ± SD</b> |
|-------------------------------|--------------|------------------|
| <b>In-patient Sample Size</b> | 282 (100%)*  |                  |
| <b>Gender</b>                 |              |                  |
| Male                          | 149 (52.8%)  |                  |
| Female                        | 133 (47.2%)  |                  |
| <b>Age (Years)</b>            |              | 49± 20.7         |
| <b>Injured Body Part</b>      |              |                  |
| Extremities                   | 69 (49.3%)   |                  |
| Abdomen/Thorax                | 3 (2.1%)     |                  |
| Head/Face                     | 27 (19.3%)   |                  |
| Spine                         | 5 (3.6%)     |                  |
| Multiple Regions              | 28 (20%)     |                  |
| Other Regions                 | 8 (5.7%)     |                  |
| <b>Hospital Admission</b>     |              |                  |

|                                             |             |  |
|---------------------------------------------|-------------|--|
| Floor                                       | 139 (84.8%) |  |
| ICU                                         | 25 (15.2%)  |  |
| <b>Injury Category</b> †                    |             |  |
| Primary                                     | 40 (14.2%)  |  |
| Concussion                                  | 36 (12.8%)  |  |
| Blast Lung                                  | 3 (1.1%)    |  |
| Tympanic Membrane Rupture                   | 1 (0.35%)   |  |
| Secondary                                   | 105 (37.2%) |  |
| Lacerations                                 | 49 (17.4%)  |  |
| Concussion                                  | 16 (5.7%)   |  |
| Penetrating Injury (including eye injuries) | 30 (10.6%)  |  |
| Traumatic Amputation                        | 8 (2.8%)    |  |
| Pneumothorax                                | 2 (0.71%)   |  |
| Tertiary                                    | 69 (24.47%) |  |
| Blunt Injury                                | 45 (16%)    |  |
| Concussion                                  | 19 (6.7%)   |  |

|                                          |             |        |
|------------------------------------------|-------------|--------|
| Crush Syndrome                           | 5 (1.8%)    |        |
| Quaternary                               | 22 (7.8%)   |        |
| Burns                                    | 4 (1.4%)    |        |
| Toxic Gas Inhalation                     | 2 (0.71%)   |        |
| Environmental Contamination              | 16 (5.7%)   |        |
| Number of Injury Category Classes        |             |        |
| Other/Not Documented                     | 166 (58.9%) |        |
| 1 Category                               | 51 (18.1%)  |        |
| ≥ 2 Categories                           | 65 (23%)    |        |
| <b>Surgery and Minor Procedures</b>      | 165 (58.5%) |        |
| <b>Length of Hospital Stay (Days)</b>    |             | 6±10.7 |
| <b>Death</b>                             |             |        |
| Total in-patient deaths (Floor and ICU)  | 11 (3.6%)   |        |
| Immediate/ blast-related                 | 6 (2.1%)    |        |
| Post-operative procedure (organ failure) | 5 (1.8%)    |        |
| <b>Long-Term Disability at Discharge</b> | 20 (12.2%)  |        |

| <b>ICD-10 Code</b>                                                                |             |
|-----------------------------------------------------------------------------------|-------------|
| Number of patients with reported ICD-10                                           | 140 (49.6%) |
| Code Occurrence ‡                                                                 |             |
| S00-S09 (injuries to the head)                                                    | 19 (13.6%)  |
| S10-S19 (injuries to the neck)                                                    | 6 (4.3%)    |
| S20-S29 (injuries to the thorax)                                                  | 3 (2.1%)    |
| S30-S39 (injuries to the abdomen, lower back, lumber spine, pelvis, and genitals) | 5 (3.6%)    |
| S40-S49 (injuries to the shoulder and upper arm)                                  | 12 (8.6%)   |
| S50-S59 (injuries to the elbow and forearm)                                       | 21 (15%)    |
| S60-S69 (injuries to the wrist)                                                   | 20 (14.3%)  |
| S70-S79 (injuries to the hip and thigh)                                           | 8 (5.7%)    |
| S80-S89 (injuries to the knee and lower leg)                                      | 7 (5%)      |
| S90-S99 (injuries to the ankle and foot)                                          | 5 (3.6%)    |
| T00-T07 (injuries involving multiple body regions)                                | 18 (12.9%)  |
| H15-H22 (disorders of the sclera, cornea, iris, and ciliary body)                 | 5 (3.6%)    |
| W20-W49 (exposure to inanimate mechanical forces)                                 | 7 (5%)      |

|                                 |          |  |
|---------------------------------|----------|--|
| M60-M79 (soft tissue disorders) | 3 (2.1%) |  |
| Other                           | 14 (10%) |  |

\* 282 out of 564 total inpatient data (50%).

† Patients sustaining multiple injuries can be classified into more than one category.

‡ Number of patients classified with a certain ICD-10 code from the total in-patient sample size (N=282). A patient's multiple diseases and injuries can be classified by multiple relevant ICD-10 codes.

**Table B2** Binary logistic regression model results predicting death and disability among in-patients.

| Variable                  | Unadjusted OR † | 95% CI †     | p-value |
|---------------------------|-----------------|--------------|---------|
| <b>Death</b>              |                 |              |         |
| <b>Injury Category</b>    |                 |              |         |
| Primary                   | 0.795           | 0.39-1.619   | 0.527   |
| Concussion                | --              | --           | 0.674   |
| Blast Lung                | 3.714           | 0.205-67.149 | 0.374   |
| Tympanic Membrane Rupture | 0               | 0            | 1       |
| Secondary                 | 1.335           | 0.866-2.060  | 0.191   |
| Traumatic Amputation      | --              | --           | 0.998   |
| Concussion                | 0               | 0            | 0.999   |
| Lacerations               | 0               | 0            | 0.997   |
| Penetrating Injury        | 0.417           | 0.074-2.371  | 0.323   |
| Tertiary                  | 1.345           | 0.856-2.114  | 0.199   |
| Concussion                | --              | --           | 0.047*  |
| Blunt Injury              | 1.297           | 0.236-7.132  | 0.765   |

|                             |        |               |        |
|-----------------------------|--------|---------------|--------|
| Crush Syndrome              | 24.000 | 1.615-356.635 | 0.021* |
| Quaternary                  | 1.85   | 0.45-7.603    | 0.394  |
| Environmental Contamination | --     | --            | 0.334  |
| Burns                       | 6.600  | 5.543-80.235  | 0.139  |
| Toxic Gas Inhalation        | 0      | 0             | 1      |
| Multiple Categories         | 1.707  | 0.421-6.915   | 0.454  |
| <b>Injured Body Part</b>    |        |               |        |
| Multiple                    | --     | --            | 0.454  |
| Head/face                   | 0.944  | 0.055-16.327  | 0.969  |
| Extremities                 | 1.855  | 0.208-16.501  | 0.58   |
| Abdomen/thorax              | 0      | 0             | 1      |
| Spine                       | 11.333 | 0.765-167.971 | 0.078  |
| Other Regions               | 2.833  | 0.152-52.738  | 0.485  |
| <b>Disability</b>           |        |               |        |
| <b>Injury Category</b>      |        |               |        |
| Primary                     | 1.874  | 0.531-6.612   | 0.329  |

|                             |       |              |       |
|-----------------------------|-------|--------------|-------|
| Concussion                  | --    | --           | 1     |
| Blast Lung                  | 0     | 0            | 1     |
| Tympanic Membrane Rupture   | 0     | 0            | 1     |
| Secondary                   | 1.146 | 0.440-2.981  | 0.78  |
| Traumatic Amputation        | --    | --           | 0.652 |
| Concussion                  | 2.625 | 0.22-31.349  | 0.446 |
| Lacerations                 | 0.946 | 0.095-9.378  | 0.962 |
| Penetrating Injury          | 1.667 | 0.257-10.792 | 0.592 |
| Tertiary                    | 0.812 | 0.331-1.991  | 0.649 |
| Concussion                  | --    | --           | 0.455 |
| Blunt Injury                | 0.412 | 0.09-1.881   | 0.252 |
| Crush Syndrome              | 1.167 | 0.094-14.518 | 0.905 |
| Quaternary                  | 0     | 0            | 0.999 |
| Environmental Contamination | --    | --           | 1     |
| Burns                       | 0     | 0            | 0.999 |
| Toxic Gas Inhalation        | 0     | 0            | 1     |



|                          |       |              |       |
|--------------------------|-------|--------------|-------|
| Multiple Categories      | 1.891 | 0.473-7.564  | 0.368 |
| <b>Injured Body Part</b> |       |              |       |
| Multiple                 | --    | --           | 0.301 |
| Head/face                | 0.464 | 0.072-2.976  | 0.418 |
| Extremities              | 0.236 | 0.052-1.072  | 0.062 |
| Abdomen/thorax           | 0     | 0            | 1     |
| Spine                    | 2.167 | 0.262-17.892 | 0.473 |
| Other Regions            | 0     | 0            | 0.999 |

\* Significance (p-value  $\leq 0.05$ )

† Abbreviations: OR=Odds Ratio; CI= Confidence Interval
